# Supplementary material
Source: PubMed Central journal article supplement (PMC6750646)
Supplement: bm9b00304_si_001.pdf [file bm9b00304_si_001.pdf]

# Supporting Information

## **Nano- and micro-patterned polycaprolactone cellulose composite surfaces with tunable protein adsorption, fibrin clot formation and endothelial cellular response**

*Tamilselvan Mohan<sup>†\*</sup>, Chandran Nagaraj<sup>‡</sup>, Bence M. Nagy<sup>‡</sup>, Matej Bračič<sup>†</sup>, Uroš*

*Maver<sup>β</sup>, Andrea Olschewski<sup>‡,§</sup>, Karin Stana Kleinschek<sup>†\*</sup> and Rupert Kargl<sup>†\*\*</sup>*

<sup>†</sup>Laboratory for Characterisation and Processing of Polymers, Faculty of Mechanical

Engineering, University of Maribor, Smetanova 17, 2000 Maribor, Slovenia

<sup>‡</sup>Ludwig Boltzmann Institute for Lung Vascular Research, Stiftingtalstrasse 24

8010 Graz, Austria

<sup>§</sup>Otto Loewi Research Center, Chair of Physiology Neue Stiftingtalstraße 6/D05 8010

Graz, Austria

<sup>β</sup>University of Maribor, Faculty of Medicine, Institute of Biomedical Sciences,

Taborska ulica 8, SI-2000 Maribor, Slovenia

**KEYWORDS:** nano-structure, thin films, biomaterial, primary human pulmonary artery endothelial cells, blood plasma coagulation, protein adsorption, cell culture

## Removal of TMSC or PCL from blend films

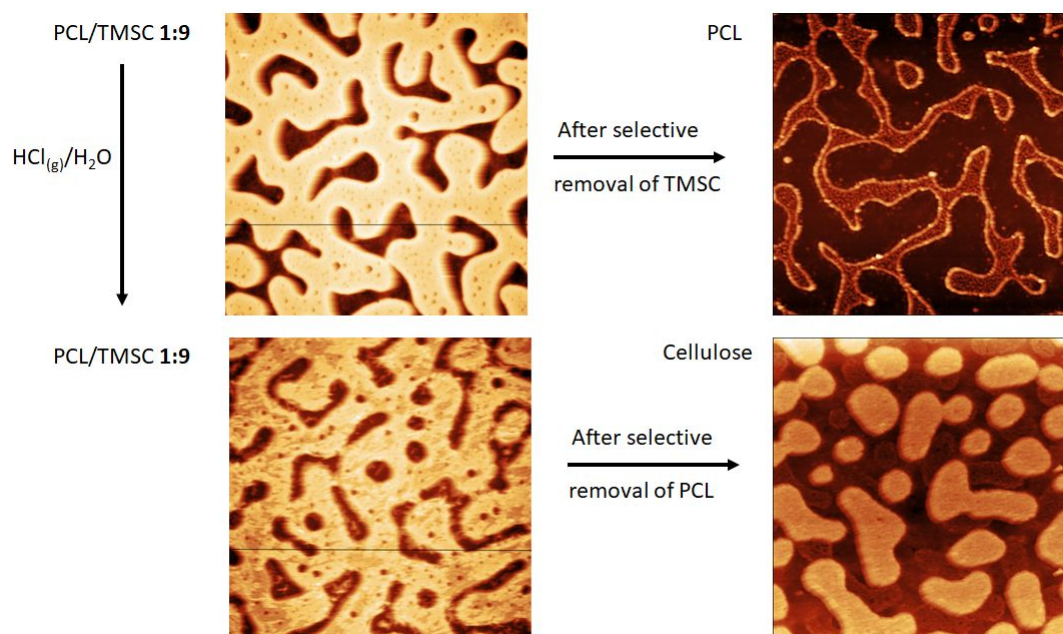

**Figure S1.** AFM topographical image ( $10 \times 10 \mu\text{m}^2$ ) of a PCL/TMSC film (top left) after the removal of TMSC with hexamethyldisiloxane (HMDSO) (top right) and a PCL/Cellulose film (bottom left) after the removal of PCL with chloroform (bottom right) (image size  $10 \mu\text{m} \times 10 \mu\text{m}$ ).

## ATR-IR spectra of PCL/TMSC films

An increased R-OH band at  $3400 \text{ cm}^{-1}$  and a decreased R-Si band at  $845$  and  $753 \text{ cm}^{-1}$  is evidence for the regeneration of TMSC into cellulose (Figure S2 and S3). The usual R-Si band at  $1252 \text{ cm}^{-1}$  is very close to the  $1240 \text{ cm}^{-1}$  R-O-C band from PCL. However careful evaluation of the regenerated films shows that the band at  $1252 \text{ cm}^{-1}$  decreases while the band at  $1240 \text{ cm}^{-1}$  is retained.

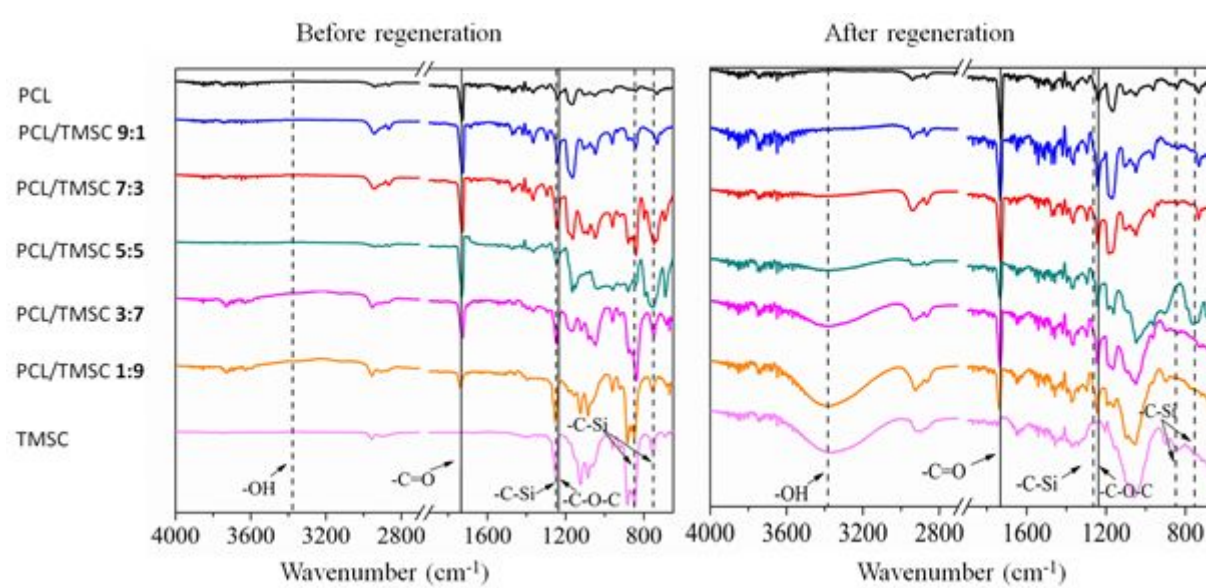

**Figure S2.** ATR-IR spectra of PCL/TMSC films, before and after regeneration with HCl vapors. The lines show the peaks assigned to the functional groups of either TMSC/Cellulose (dotted) or PCL (straight).

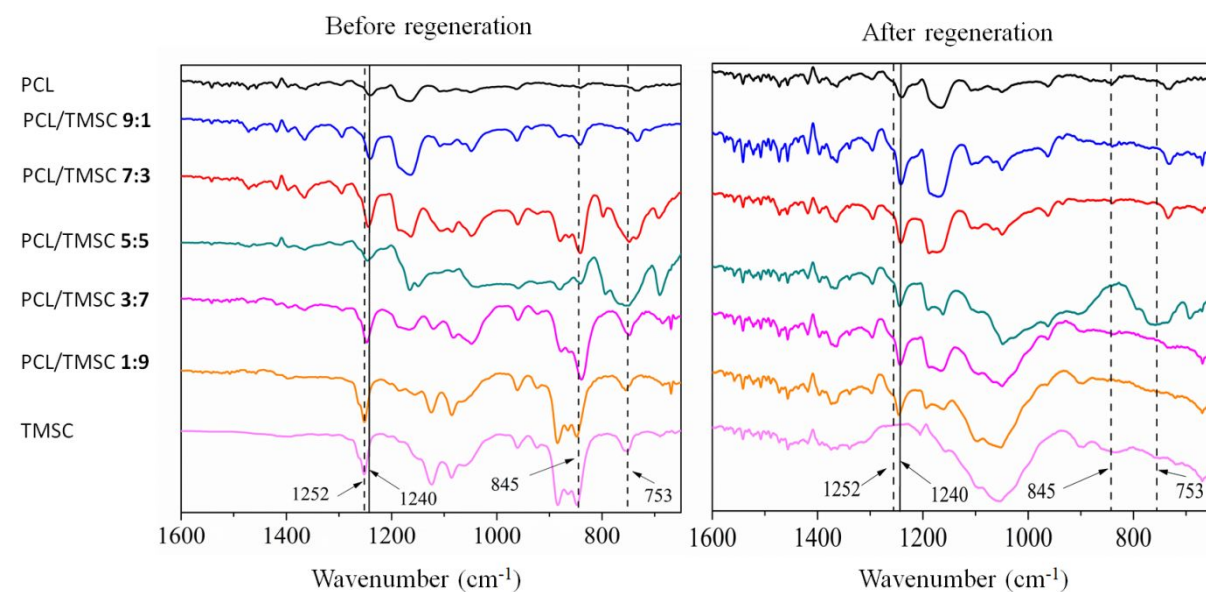

**Figure S3.** ATR-IR spectra of PCL/TMSC films for the region 650 – 1600  $\text{cm}^{-1}$ . The lines show the peaks assigned to TMSC/Cellulose (dotted, C-Si rocking vibrations at 1252, 845 and 753  $\text{cm}^{-1}$ ) and PCL (straight, asymmetric C-O-C stretching at 1240  $\text{cm}^{-1}$ ) before and after regeneration.

## Interaction of cell growth media with thin films in QCM-D

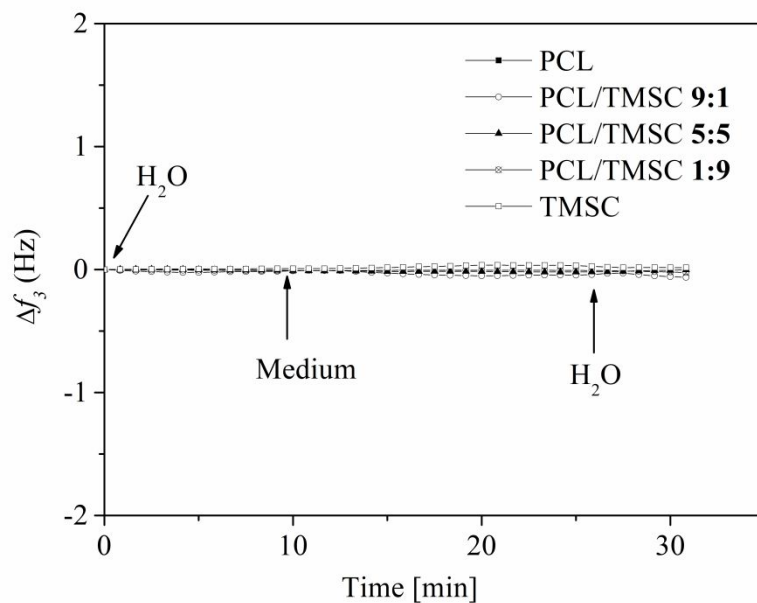

**Figure S4.** QCM-D frequency changes for the adsorption of the cell growth media EBM-2, Lonza, on PCL/TMSC surfaces after regeneration.

## zeta potential measurements

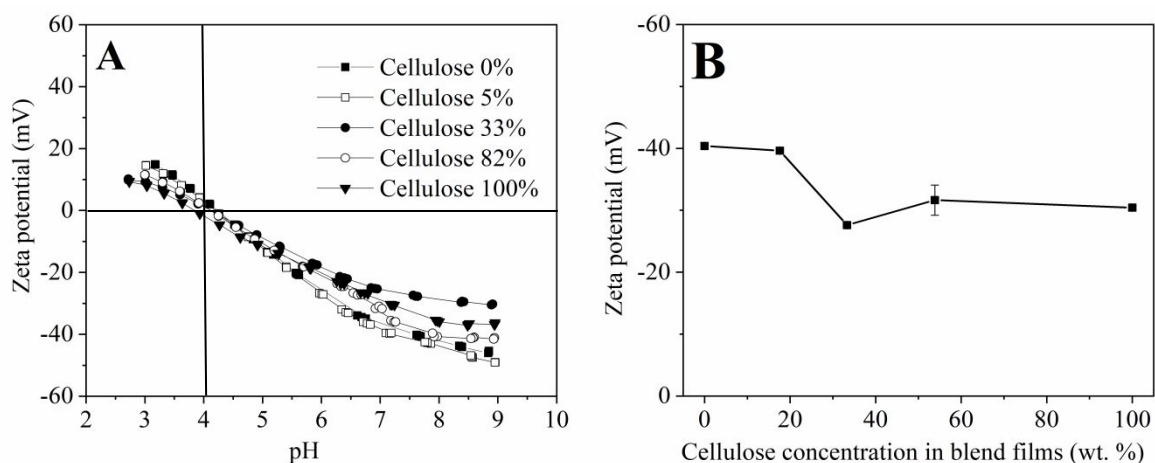

**Figure S5.** A) zeta potential of blend films containing increasing amounts of cellulose. B) zeta potential at pH 7.4.

## pH-potentiometric titrations of proteins

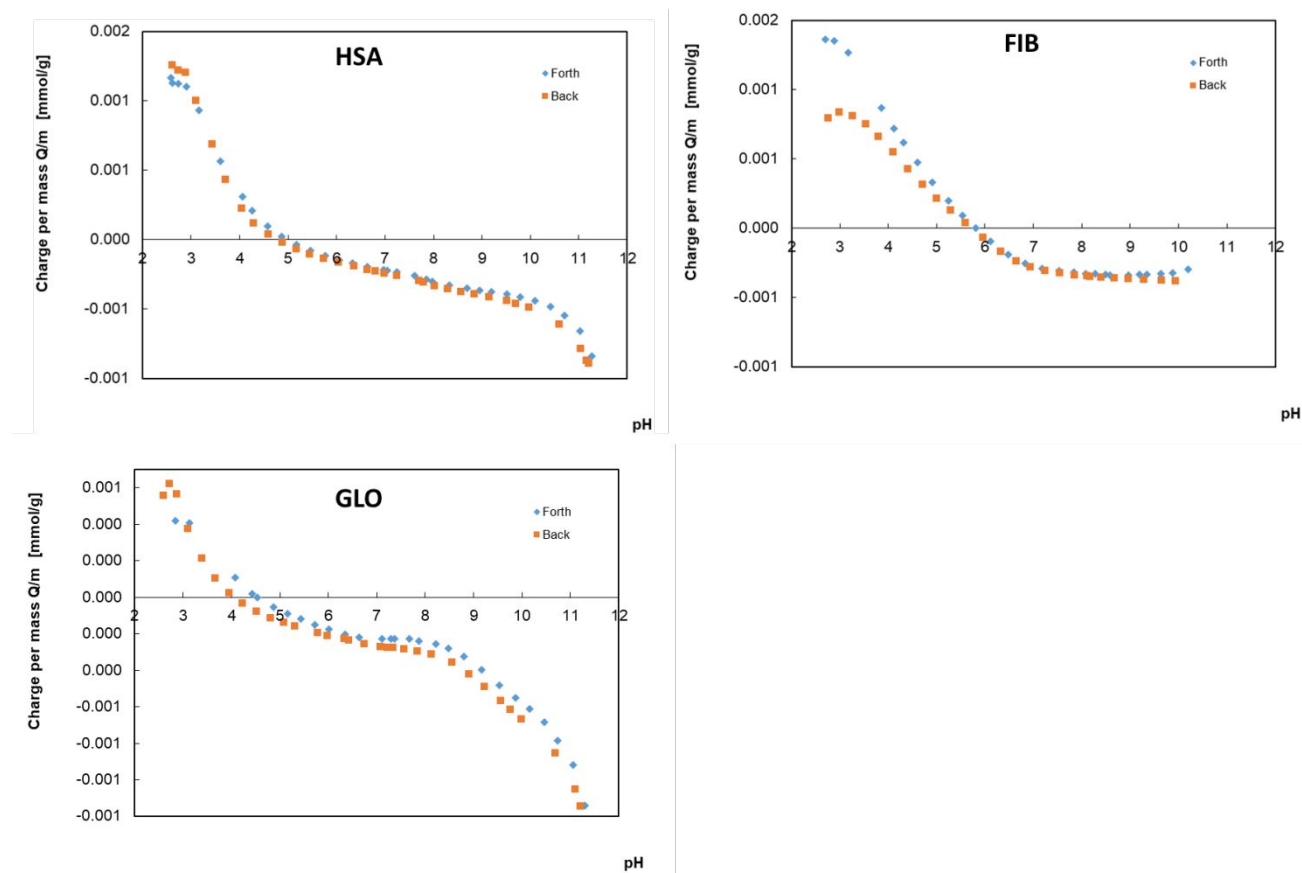

**Figure S6.** Charges of different proteins as a function of pH
